# Supplementary material
Source: MDPI journal article supplement (https://www.mdpi.com/2073-4441/15/21/3734)
Supplement: s1 [file s1]

Microbiological and physicochemical quality of groundwater and risk factors for its pollution in Ouagadougou, Burkina Faso

by Oumar Traoré, Dissinviel Stéphane Kpoda, René Dembélé, Courage Kosi Setsoafia Saba, Johannes Cairns, Nicolas Barro and Kaisa Haukka

Table S1: Physicochemical and microbiological parameters of boreholes water

| Physicochemical parameters |               |            |     |         |                         |                         |                         |                         |         |                          |                          |            |           |                         | Microbiological parameters<br>(CFU/100 mL) |                |      |      |      |
|----------------------------|---------------|------------|-----|---------|-------------------------|-------------------------|-------------------------|-------------------------|---------|--------------------------|--------------------------|------------|-----------|-------------------------|--------------------------------------------|----------------|------|------|------|
| Boreholes codes            | Turbity (NTU) | EC (µS/cm) | pH  | TH (°f) | Ca <sup>2+</sup> (mg/L) | Mg <sup>2+</sup> (mg/L) | NO <sup>2-</sup> (mg/L) | NO <sup>3-</sup> (mg/L) | TA (°f) | PO4 <sup>3-</sup> (mg/L) | SO4 <sup>2-</sup> (mg/L) | Cl- (mg/L) | F- (mg/L) | Fe <sup>2+</sup> (mg/L) | T C                                        | <i>E. coli</i> | E nt | Ps   | ASRB |
| B01                        | 0.82          | 204        | 6.7 | 4.3     | 11.8                    | 3.3                     | 0                       | 0                       | 101.6   | 0.13                     | 0                        | 2.1        | 0         | 0                       | 89                                         | 16             | 0    | 0    | 0    |
| B02                        | 0.48          | 286        | 6.7 | 8.4     | 15.1                    | 11.3                    | 0                       | 5.7                     | 131.3   | 0.9                      | 0                        | 2.8        | 0.1       | 0.02                    | >100                                       | 0              | 0    | 0    | 0    |
| B03                        | 1.28          | 163,3      | 6.2 | 4       | 9.6                     | 3.9                     | 0                       | 5.3                     | 75.8    | 0.6                      | 0                        | 1.4        | 0.3       | 0.05                    | 0                                          | 0              | 0    | >100 | 0    |
| B04                        | 0.62          | 293        | 6.4 | 8.4     | 18.3                    | 9.2                     | 0                       | 15.2                    | 112.1   | 1.2                      | 0                        | 7.8        | 0         | 0                       | 14                                         | 0              | 0    | 0    | 0    |
| B05                        | 0.52          | 50,1       | 6.8 | 0.6     | 0.9                     | 0.9                     | 0                       | 3.3                     | 22.4    | 0.13                     | 0                        | 2.1        | 0.4       | 0                       | >100                                       | 0              | 0    | 0    | 0    |
| B06                        | 0.67          | 672        | 7.1 | 15.1    | 42.4                    | 10.8                    | 0                       | 0.7                     | 309.8   | 0.85                     | 22                       | 9.1        | 3.5       | 0.04                    | 8                                          | 0              | 0    | 75   | 0    |
| B07                        | 0.42          | 366        | 6.4 | 11.4    | 23.4                    | 13.5                    | 0                       | 10.3                    | 152.1   | 0.6                      | 11.5                     | 7.1        | 0.7       | 0                       | 14                                         | 0              | 0    | 0    | 0    |

|     |             |       |     |      |       |      |     |              |           |      |     |       |     |      |                |           |                      |           |    |
|-----|-------------|-------|-----|------|-------|------|-----|--------------|-----------|------|-----|-------|-----|------|----------------|-----------|----------------------|-----------|----|
| B08 | <b>6.02</b> | 274   | 6.3 | 7.4  | 17.6  | 7.2  | 0   | 2            | 137.<br>4 | 0.3  | 3   | 5     | 0.5 | 0.39 | <b>&gt;100</b> | <b>3</b>  | 0                    | 0         | 0  |
| B09 | 0.48        | 1179  | 6.4 | 43.8 | 114.2 | 37.2 | 0   | 41.4         | 434.<br>1 | 0.5  | 23  | 21.3  | 0.1 | 0    | <b>10</b>      | 0         | 0                    | 0         | 0  |
| B10 | 0.48        | 1161  | 7.1 | 41.7 | 106   | 37   | 0   | 40.5         | 446.<br>5 | 0.7  | 11  | 17    | 0.1 | 0    | <b>9</b>       | 0         | 0                    | 0         | 0  |
| B11 | 0.7         | 390   | 6.6 | 10.4 | 20.6  | 12.8 | 0.1 | 3.3          | 168.<br>5 | 0.49 | 0   | 1.8   | 0.3 | 0.28 | 0              | 0         | 0                    | 0         | 0  |
| B12 | <b>218</b>  | 1054  | 6.5 | 30.4 | 77    | 27.2 | 0.3 | <b>469.9</b> | 96.9      | 0.7  | 17  | 116.4 | 0   | 0.17 | 0              | 0         | 0                    | 0         | 0  |
| B13 | 1.67        | 371   | 6.5 | 13.1 | 25.1  | 16.7 | 0   | 1.3          | 162       | 1.1  | 8.5 | 2.8   | 0.4 | 0    | <b>92</b>      | <b>33</b> | 0                    | 0         | 0  |
| B14 | <b>9.1</b>  | 145,4 | 6.3 | 3.4  | 6.6   | 4.3  | 0.1 | 7.9          | 40.1      | 1.94 | 0   | 2.1   | 0.3 | 0.07 | <b>68</b>      | <b>5</b>  | 0                    | <b>66</b> | 0  |
| B15 | 0.5         | 387   | 6.3 | 13.4 | 32.2  | 13   | 0   | 26.2         | 91.5      | 0.89 | 0   | 32.7  | 0.4 | 0.09 | 0              | 0         | 0                    | 0         | 0  |
| B16 | 2.8         | 270   | 6.4 | 8    | 17.8  | 8.6  | 0   | 3.1          | 113.<br>5 | 1.18 | 0   | 3.6   | 0.2 | 0    | 0              | 0         | 0                    | 0         | 0  |
| B17 | 1           | 399   | 6.7 | 14.5 | 30    | 16.9 | 0   | 3.1          | 182       | 0.73 | 8   | 3.6   | 0.2 | 0.04 | <b>66</b>      | <b>3</b>  | 0                    | <b>56</b> | 0  |
| B18 | <b>13.2</b> | 310   | 6.9 | 9.7  | 22.8  | 9.8  | 0.1 | 5.9          | 129.<br>5 | 1.63 | 0   | 1.8   | 0.4 | 0.05 | <b>88</b>      | <b>18</b> | <b>3</b><br><b>8</b> | 0         | 12 |
| B19 | 2.5         | 356   | 6.7 | 11   | 29    | 9.1  | 0.1 | 8.8          | 141.<br>1 | 0.63 | 0   | 4.6   | 0.6 | 0.15 | 0              | 0         | 0                    | 0         | 0  |
| B20 | <b>34.2</b> | 330   | 6.4 | 8.9  | 21.9  | 8    | 0   | 2.5          | 82.9      | 1.02 | 7   | 28.2  | 0.6 | 0.15 | <b>56</b>      | <b>16</b> | 0                    | 0         | 0  |
| B21 | 1.4         | 645   | 6.9 | 23.2 | 69.9  | 13.8 | 0   | 7.5          | 250       | 0.54 | 34  | 5.7   | 0.8 | 0.07 | <b>57</b>      | <b>16</b> | 0                    | 0         | 0  |
| B22 | <b>34.4</b> | 335   | 6.4 | 8.9  | 22.3  | 8    | 0   | 2.6          | 84.9      | 1.03 | 7   | 28.4  | 0.6 | 0.16 | <b>69</b>      | <b>16</b> | 0                    | 0         | 0  |

|                                                               |             |      |             |      |      |      |      |         |           |      |      |       |       |       |           |           |   |   |   |
|---------------------------------------------------------------|-------------|------|-------------|------|------|------|------|---------|-----------|------|------|-------|-------|-------|-----------|-----------|---|---|---|
| B23                                                           | 1.4         | 645  | 6.9         | 23.2 | 69.9 | 13.8 | 0    | 7.5     | 250       | 0.54 | 34   | 5.7   | 0.8   | 0.07  | <b>87</b> | <b>16</b> | 0 | 0 | 0 |
| B24                                                           | <b>41</b>   | 462  | 6.8         | 13.8 | 38.2 | 10.2 | 0    | 9.7     | 163.<br>8 | 0.46 | 20   | 0.7   | 0.5   | 0.02  | <b>6</b>  | 0         | 0 | 0 | 0 |
| B25                                                           | 2.08        | 345  | 7.1         | 9.7  | 21.6 | 10.4 | 0    | 11.2    | 106.<br>1 | 1.12 | 2.5  | 13.5  | 0.4   | 0     | 0         | 0         | 0 | 0 | 0 |
| B26                                                           | 0.36        | 283  | 7           | 7.2  | 16.8 | 7.3  | 0    | 5.1     | 97.7      | 0.75 | 0    | 3.9   | 0.2   | 0.02  | <b>69</b> | <b>20</b> | 1 | 0 | 0 |
| B27                                                           | 0.34        | 319  | 6.8         | 8.8  | 20.5 | 8.8  | 0    | 18.3    | 92.9      | 1.15 | 7    | 7.8   | 0.2   | 0.04  | 0         | 0         | 0 | 0 | 0 |
| B28                                                           | 0.26        | 235  | 7           | 7.2  | 17   | 7.3  | 0.1  | 2.2     | 103.<br>2 | 0.82 | 0    | 1.4   | 0.2   | 0.2   | 0         | 0         | 0 | 0 | 0 |
| B29                                                           | 0.16        | 245  | 6.6         | 8.7  | 17.8 | 10.4 | 0    | 7.9     | 90.8      | 1.42 | 0    | 6.4   | 0     | 0.07  | 0         | 0         | 0 | 0 | 0 |
| B30                                                           | 0.27        | 272  | 6.7         | 10.2 | 21.2 | 11.8 | 0    | 6.8     | 113.<br>3 | 1.49 | 0    | 5.7   | 0     | 0.03  | 0         | 0         | 0 | 0 | 0 |
| B31                                                           | 0.19        | 1365 | 7.2         | 38   | 86.8 | 39.5 | 0    | 43.8    | 223.<br>3 | 0.68 | 27   | 166.9 | 1     | 0.02  | 0         | 0         | 0 | 0 | 0 |
| B32                                                           | <b>12.2</b> | 298  | 7.1         | 8.4  | 19.3 | 8.8  | 0    | 26.2    | 69.6      | 0.99 | 3    | 3.7   | 0.4   | 0.04  | 0         | 0         | 0 | 0 | 0 |
| Total of boreholes with non-compliant physicochemical quality |             |      |             |      |      |      |      | 8 (25%) |           |      |      |       |       |       |           |           |   |   |   |
| Total of boreholes with non-compliant microbiological quality |             |      |             |      |      |      |      |         |           |      |      |       |       |       |           | 20 (62%)  |   |   |   |
| NG/WHO<br>G                                                   | ≤ 1,5       | ND   | 6.5-<br>8.5 | ND   | ND   | ND   | ≤ 50 | ≤ 50    | ND        | ND   | ≤ 50 | ND    | ≤ 1.5 | ≤ 0.3 | 0         | 0         | 0 | 0 | 0 |

NG = National guidelines, WHOG=World Health Organization Guidelines, ND= Not determined, TC= Total coliforms Ps =Pseudomonas aerigunosa, Ent= Entrecoccus, ASRB= Anaerobic sulphite reducing bacteria

NB: values in bold are those that do not meet national guidelines

**Table S2.** Extraction Method, Principal Component Analysis

| Component | Total variance Explained |               |              |                                     |               |              |
|-----------|--------------------------|---------------|--------------|-------------------------------------|---------------|--------------|
|           | Initial Eigenvalues      |               |              | Extraction Sums of Squared Loadings |               |              |
|           | Total                    | % of Variance | Cumulative % | Total                               | % of Variance | Cumulative % |
| 1         | 5,984                    | 42,747        | 42,747       | 5,984                               | 42,747        | 42,747       |
| 2         | 3,053                    | 21,809        | 64,556       | 3,053                               | 21,809        | 64,556       |
| 3         | 1,279                    | 9,139         | 73,695       |                                     |               |              |
| 4         | 1,120                    | 8,003         | 81,698       |                                     |               |              |
| 5         | 7,798                    | 5,570         | 87,268       |                                     |               |              |
| 6         | 6,590                    | 4,707         | 91,975       |                                     |               |              |
| 7         | 5,982                    | 4,273         | 96,248       |                                     |               |              |
| 8         | 2,978                    | 2,128         | 98,376       |                                     |               |              |
| 9         | 1,455                    | 1,039         | 99,415       |                                     |               |              |
| 10        | 3,545                    | 0,253         | 99,668       |                                     |               |              |
| 11        | 3,048                    | 0,218         | 99,886       |                                     |               |              |
| 12        | 1,255                    | 0,090         | 99,976       |                                     |               |              |
| 13        | 3,012                    | 0,022         | 99,998       |                                     |               |              |
| 14        | 3,003                    | 0,002         | 100          |                                     |               |              |

**Table S3.** Contribution of physicochemical parameters in the main components

| Variables                     | F1    | F2    | F3    | F4    |
|-------------------------------|-------|-------|-------|-------|
| %                             | 42,7% | 21,8% | 9,1%  | 8%    |
| Turbidity                     | 2.48  | 23.47 | 0.54  | 1.49  |
| EC                            | 16.33 | 0.08  | 0.20  | 0.01  |
| pH                            | 1.59  | 4.68  | 0.63  | 31.23 |
| TH                            | 15.68 | 0.43  | 1.64  | 1.68  |
| Ca <sup>2+</sup>              | 15.46 | 0.61  | 0.39  | 1.68  |
| Mg <sup>2+</sup>              | 14.10 | 0.13  | 5.92  | 1.50  |
| NO <sub>2</sub> <sup>-</sup>  | 0.89  | 23.4  | 0.55  | 1.59  |
| NO <sub>3</sub> <sup>-</sup>  | 4.51  | 20.86 | 0.02  | 1.00  |
| TA                            | 9.46  | 8.25  | 0.07  | 3.96  |
| PO <sub>4</sub> <sup>3-</sup> | 1.31  | 0.53  | 25.96 | 16.92 |
| SO <sub>4</sub> <sup>2-</sup> | 9.79  | 2.17  | 6.53  | 0.97  |
| Cl <sup>-</sup>               | 7.60  | 4.52  | 0.20  | 4.17  |
| F <sup>-</sup>                | 0.64  | 4.21  | 30.31 | 22.23 |
| Fe <sup>2+</sup>              | 0.13  | 6.62  | 27.03 | 11.57 |

**Table S4.** Correlation matrix between the microbiological and physicochemical parameters

|                               | Turbidity | EC    | pH    | TH    | Ca <sup>2+</sup> | Mg <sup>2+</sup> | NO <sup>2-</sup> | NO <sup>3-</sup> | TA    | PO <sub>4</sub> <sup>3-</sup> | SO <sub>4</sub> <sup>2-</sup> | Cl <sup>-</sup> | F <sup>-</sup> | Fe <sup>2+</sup> | TC    | <i>E. coli</i> | Ent   | Ps    | ASRB |
|-------------------------------|-----------|-------|-------|-------|------------------|------------------|------------------|------------------|-------|-------------------------------|-------------------------------|-----------------|----------------|------------------|-------|----------------|-------|-------|------|
| Turbity                       | 1         |       |       |       |                  |                  |                  |                  |       |                               |                               |                 |                |                  |       |                |       |       |      |
| EC                            | 0.31      | 1     |       |       |                  |                  |                  |                  |       |                               |                               |                 |                |                  |       |                |       |       |      |
| pH                            | -0.15     | 0.30  | 1     |       |                  |                  |                  |                  |       |                               |                               |                 |                |                  |       |                |       |       |      |
| TH                            | 0.24      | 0.97  | 0.25  | 1     |                  |                  |                  |                  |       |                               |                               |                 |                |                  |       |                |       |       |      |
| Ca <sup>2+</sup>              | 0.24      | 0.96  | 0.26  | 0.99  | 1                |                  |                  |                  |       |                               |                               |                 |                |                  |       |                |       |       |      |
| Mg <sup>2+</sup>              | 0.22      | 0.95  | 0.22  | 0.96  | 0.9              | 1                |                  |                  |       |                               |                               |                 |                |                  |       |                |       |       |      |
| NO <sup>2-</sup>              | 0.77      | 0.17  | -0.09 | 0.12  | 0.11             | 0.12             | 1                |                  |       |                               |                               |                 |                |                  |       |                |       |       |      |
| NO <sup>3-</sup>              | 0.94      | 0.45  | -0.08 | 0.39  | 0.38             | 0.39             | 0.78             | 1                |       |                               |                               |                 |                |                  |       |                |       |       |      |
| TA                            | -0.15     | 0.77  | 0.29  | 0.83  | 0.84             | 0.74             | -0.17            | -0.02            | 1     |                               |                               |                 |                |                  |       |                |       |       |      |
| PO <sub>4</sub> <sup>3-</sup> | -0.04     | -0.23 | -0.09 | -0.22 | -0.26            | -0.14            | 0.10             | -0.07            | -0.28 | 1                             |                               |                 |                |                  |       |                |       |       |      |
| SO <sub>4</sub> <sup>2-</sup> | 0.18      | 0.72  | 0.30  | 0.70  | 0.76             | 0.55             | -0.05            | 0.21             | 0.64  | -0.32                         | 1                             |                 |                |                  |       |                |       |       |      |
| Cl <sup>-</sup>               | 0.51      | 0.70  | 0.14  | 0.57  | 0.51             | 0.64             | 0.35             | 0.60             | 0.11  | -0.08                         | 0.39                          | 1               |                |                  |       |                |       |       |      |
| F <sup>-</sup>                | -0.11     | 0.20  | 0.31  | 0.08  | 0.12             | -0.01            | -0.15            | -0.15            | 0.30  | -0.10                         | 0.45                          | 0.08            | 1              |                  |       |                |       |       |      |
| Fe <sup>2+</sup>              | 0.24      | -0.10 | -0.27 | -0.14 | -0.12            | -0.16            | 0.40             | 0.16             | -0.16 | -0.17                         | -0.12                         | 0.05            | 0.01           | 1                |       |                |       |       |      |
| TC                            | -0.12     | -0.29 | -0.09 | -0.26 | -0.23            | -0.29            | -0.16            | -0.22            | -0.14 | -0.12                         | -0.02                         | -0.25           | -0.05          | 0.06             | 1     |                |       |       |      |
| <i>E.Coli</i>                 | -0.04     | -0.12 | -0.01 | -0.09 | -0.06            | -0.14            | -0.10            | -0.16            | -0.04 | 0.07                          | 0.14                          | -0.14           | 0.01           | -0.04            | 0.65  | 1              |       |       |      |
| Ent                           | 0,00      | -0.08 | 0.14  | -0.07 | -0.07            | -0.06            | 0.22             | -0.04            | -0.04 | 0.34                          | -0.14                         | -0.08           | -0.01          | -0.04            | 0.25  | 0.28           | 1     |       |      |
| Ps                            | -0.09     | -0.13 | -0.18 | -0.17 | -0.16            | -0.18            | -0.02            | -0.1             | -0.01 | 0.12                          | -0.02                         | -0.13           | 0.39           | -0.08            | -0.05 | -0.15          | -0.07 | 1     |      |
| ASRB                          | 0,00      | -0.08 | 0.14  | -0.07 | -0.07            | -0.06            | 0.22             | -0.04            | -0.04 | 0.34                          | -0.13                         | -0.08           | -0.01          | -0.04            | 0.25  | 0.27           | 0,99  | -0.07 | 1    |

TC, Total coliforms; Ent, Enterococcus; Ps, Pseudomonas aeriginosa, ASRB, anaerobic sulphite reducing bacteria
